# Supplementary material
Source: PubMed Central journal article supplement (PMC7366325)
Supplement: NIHMS1602293-supplement-Supplementary_Material.pdf [file NIHMS1602293-supplement-Supplementary_Material.pdf]

Supplementary Table 1a showing the summary of qualitative findings

| <b>Enablers</b>                                     | <b>Barriers</b>                                                        |
|-----------------------------------------------------|------------------------------------------------------------------------|
| LPG cooks food faster                               | Perceptions of RLP distribution preferences based on political parties |
| Men are more helpful with cooking activities        | Financial constraints – particularly for those with seasonal incomes   |
| Kitchens and utensils are cleaner due to less smoke | Fear of accidents due to news reports                                  |
| Children spend more time on school work             | Far distance to refueling station                                      |

Supplementary Table 1b showing the number of respondents for qualitative interviews

| <b>Stakeholders interviewed</b>                       | <b>Number of people</b> |
|-------------------------------------------------------|-------------------------|
| <b>National level</b>                                 |                         |
| Ministry of Petroleum (MoPET, now Ministry of Energy) | 3                       |
| Ministry of Health                                    | 1                       |
| National Petroleum Authority                          | 1                       |
| Ghana Cylinder Manufacturing Company                  | 1                       |
| National Association of LPG marketers                 | 1                       |
| LPG model district                                    | 1                       |
| <b>Community level</b>                                |                         |
| LPG marketers                                         | 2                       |
| Local political and traditional leaders               | 2                       |
| Beneficiaries in 10 FGDs                              | 71                      |
| Non-beneficiaries in 4 FGDs                           | 24                      |
| Men in 5 FGDs                                         | 30                      |
| Community contact persons for the program             | 8                       |

Supplementary Table 2: Characteristics of study participants

| Parameter                  | Total     |
|----------------------------|-----------|
| Age-Group                  |           |
| 18 – 40 years              | 114(57)   |
| >40 years                  | 86(43)    |
| Sex                        |           |
| Female                     | 198(99.0) |
| Male                       | 2(1.0)    |
| Educational Level          |           |
| None and Primary           | 39(19.5)  |
| Middle/JSS/JHS and above   | 103(51.5) |
| Ethnicity                  |           |
| Akan                       | 189(94.5) |
| Non-Akans                  | 11(5.5)   |
| Religion                   |           |
| Christian                  | 171(85.5) |
| Moslem                     | 9(4.50)   |
| Other religions            | 20(10.0)  |
| Marital Status             |           |
| Married                    | 152(76.0) |
| Living together            | 23(11.5)  |
| Divorced/widowed/separated | 25(12.5)  |
| Household Size             |           |
| < 6                        | 31(15.5)  |
| > 6                        | 122(61.0) |
| Main source of income      |           |
| Agriculture                | 183(91.5) |

|                           |         |
|---------------------------|---------|
| Working for wage          | 7(3.5)  |
| Remittances               | 0(0.0)  |
| Other(trading/unemployed) | 10(5.0) |

Supplementary Table 3: Household predictors of LPG stove use among respondents using Estimating Generalized equation.

| Parameter                  | Odds Ratio | 95% CI        | P- Value |
|----------------------------|------------|---------------|----------|
| <b>Age-Group</b>           |            |               |          |
| 18 – 30 years              | 1          |               |          |
| 31-42 years                | 0.690      | 0.579 – 0.823 | 0.000    |
| 43-52 years                | 1.009      | 0.813 – 1.253 | 0.934    |
| Above 53 years             | 0.824      | 0.611 – 1.112 | 0.205    |
| <b>Educational Level</b>   |            |               |          |
| None                       | 1          |               |          |
| Primary                    | 1.031      | 0.781 – 1.361 | 0.828    |
| Middle                     | 1.473      | 1.169 – 1.855 | 0.001    |
| Technical                  | 1.614      | 1.195 – 2.179 | 0.002    |
| Post - Middle              | 2.649      | 1.203 – 5.832 | 0.016    |
| <b>Ethnical Background</b> |            |               |          |
| Akan                       | 1          |               |          |
| Bimoba                     | 3.406      | 1.525 – 7.606 | 0.003    |
| Frafra                     | 3.118      | 1.819 – 5.344 | 0.000    |
| Sisala                     | 1.221      | 0.616 – 2.419 | 0.567    |
| Gonja                      | 2.727      | 1.469 – 5.062 | 0.001    |
| Konkomba                   | 0.833      | 0.428 – 1.621 | 0.591    |
| Other                      | 0.675      | 0.260 – 1.749 | 0.418    |
| Household Size             | 1.031      | 1.007 – 1.055 | 0.010    |
